# Supplementary material
Source: MDPI journal article supplement (https://www.mdpi.com/2072-4292/7/9/12297)
Supplement: s1 [file s1]

**Supplementary Materials**

**How Does the Threshold Influence the Results on Macroalagae-Contaminated Pixels**

It is known that the presence of macroalgae would lead to elevated Chl-a. Thus, the difference between the Chl-a of a macroalgae-contaminated pixel and its background Chl-a (the average of the window of 9 × 9 pixels), might be used to identify the macroalgae-contaminated pixel with a threshold.

As shown in Figure S1 with the transect (P-P' in Figure 4), the number of pixels classified as macroalgae-contaminated pixels increased gradually with the decrease of threshold while the mean Chl-a of macroalgae-free pixels decreased. Because of the variations in phytoplankton Chl-a, more macroalgae-free pixels might be wrongly classified as macroalgae-contaminated pixels when the threshold was setting too low. When the threshold was lower than 0.5 μg/L, the number of macroalgae-contaminated pixels began to increase sharply (Figure S1a) while the mean Chl-a of macroalgae-free pixels dropped sharply (Figure S1b). This suggests that 0.5 μg/L would be a reasonable threshold for identifying the macroalgae-contaminated pixels. This can be validated through the index of NDVI. The frequency distributions in NDVI of macroalgae-free pixels are close to normal distributions, but the presence of macroalgae pixels leads to a long tail in the frequency distribution. Figure S2a shows a typical long tail in the frequency distribution with the presence of macroalgae-contaminated pixels along the P- P' transect, while after the removal of the macroalgae-contaminated pixels (using the 0.5 μg/L threshold) the distribution is close to normal (Figure S2b).

|  |  |
| --- | --- |
| (**a**) | (**b**) |

**Figure S1.** (**a**) Number of macroalgae-contaminated pixels along a transect (P-P' in
Figure 4) with the change of threshold, and (**b**) Mean Chl-a after removing the macroalgae-contaminated pixels along the transect (P-P').

| 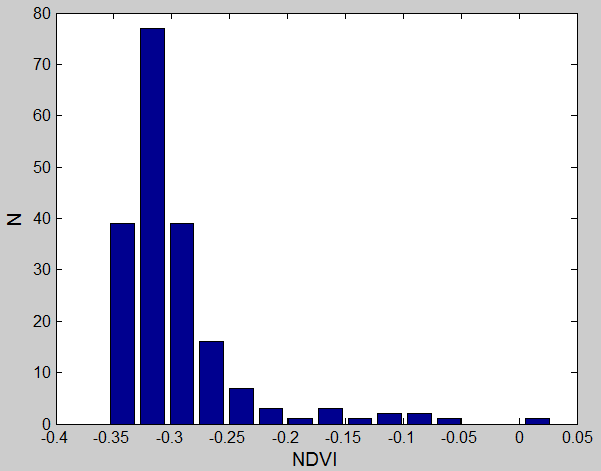 | 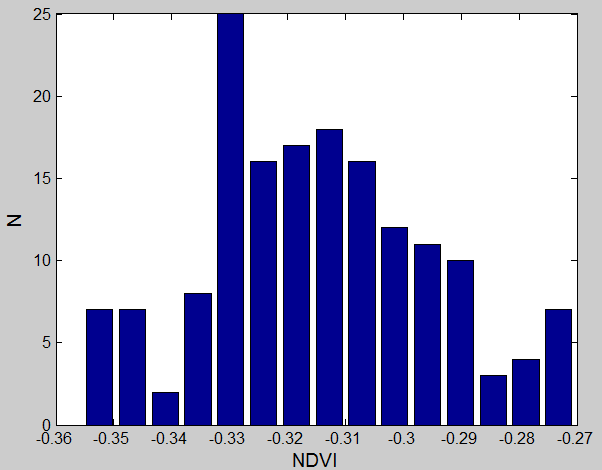 |
| --- | --- |
| (**a**) | (**b**) |

**Figure S2.** Frequency distribution in NDVI of pixels along the transect (P-P'), (**a**) before and (**b**) after the removal of macroalgae-contaminated pixels using the threshold of 0.5 μg/L.

**Northward Surface Currents in June and July in the western Yellow Sea (Figure S3)**

The hydrodynamic model Delft-3D was used to derive the surface currents in the Yellow Sea. In the model, the open boundary was between the Changjiang River mouth and the southwest Korean Peninsula. The horizontal resolution of the model grids was about 2000m, and there were ten sigma layers in the vertical direction. The model was driven by nine main tidal constituents on the open boundary, and by wind and air pressure over the sea surface. The (unpublished) modeling work was conducted by Mr. Xiangyang Zheng and Dr. Qianguo Xing of Yaitai Institute of Coastal Research, Chinese Academy of Sciences.

| 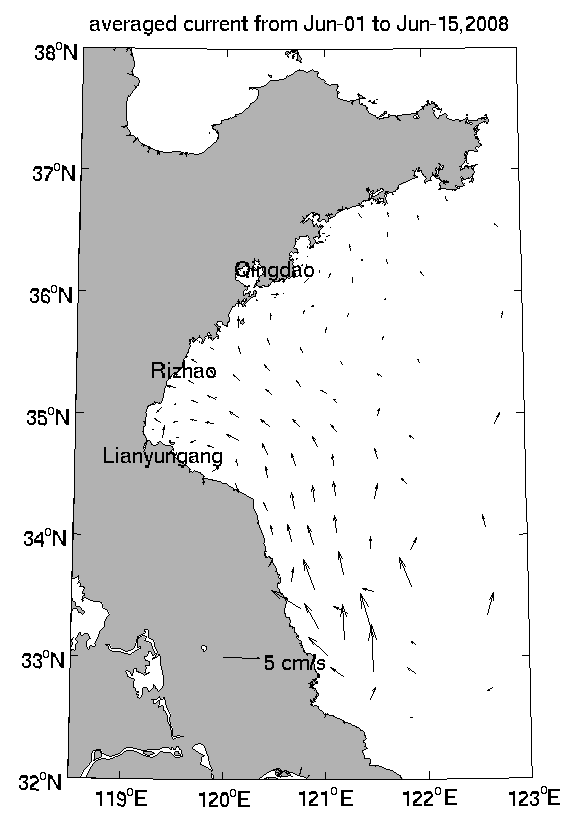 | 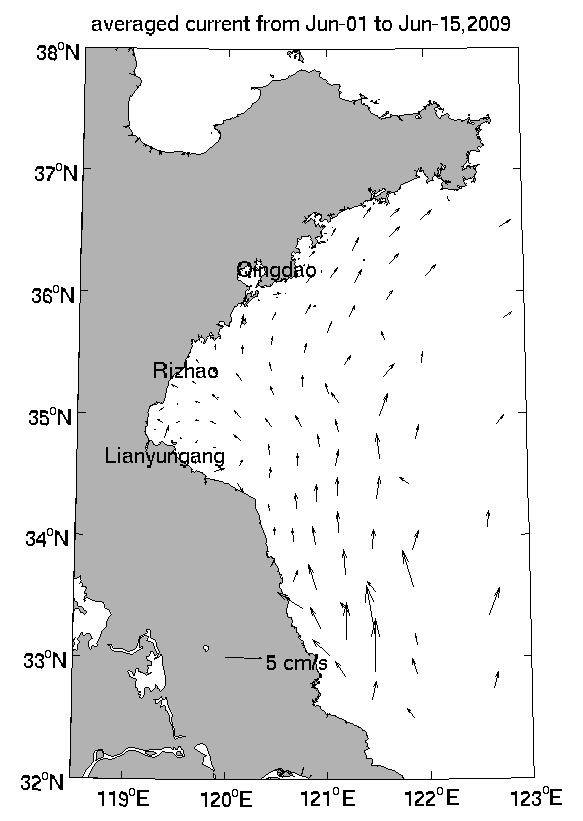 | 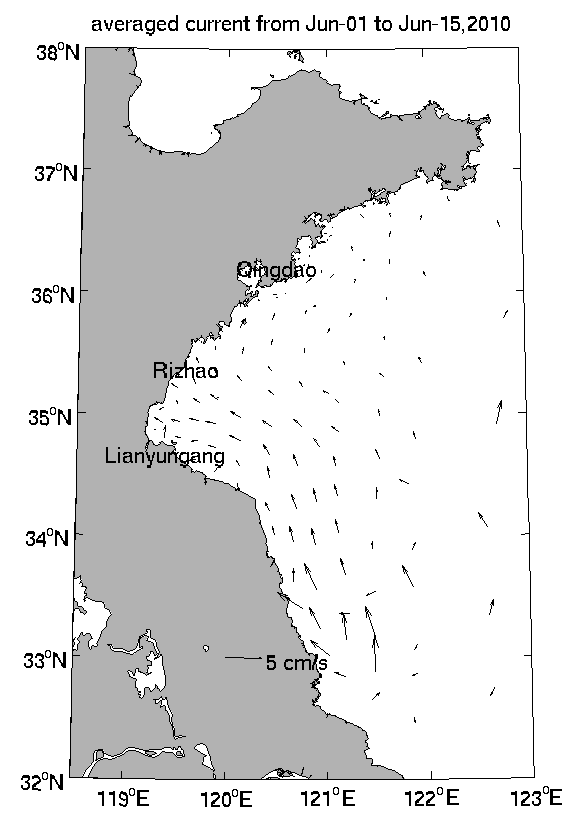 | 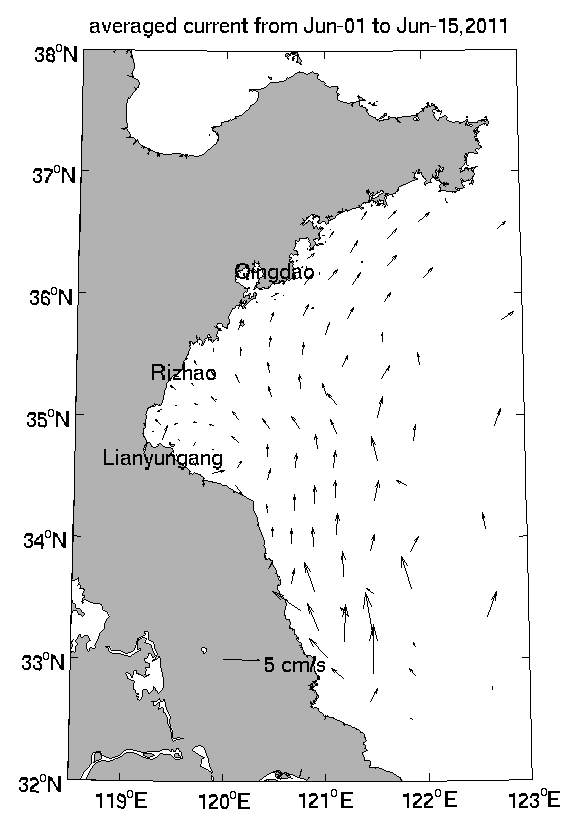 |
| --- | --- | --- | --- |
| 1–15June | | | |

**Figure S3.** *Cont.*

| 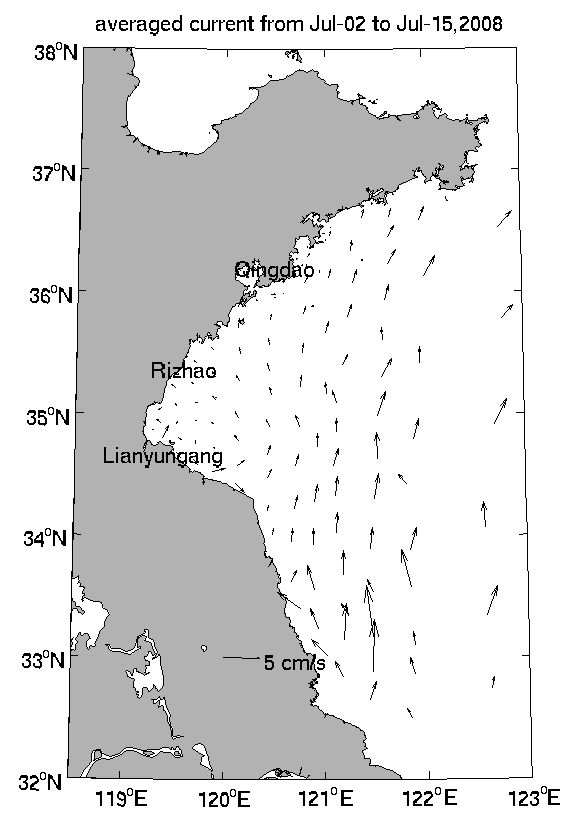 | 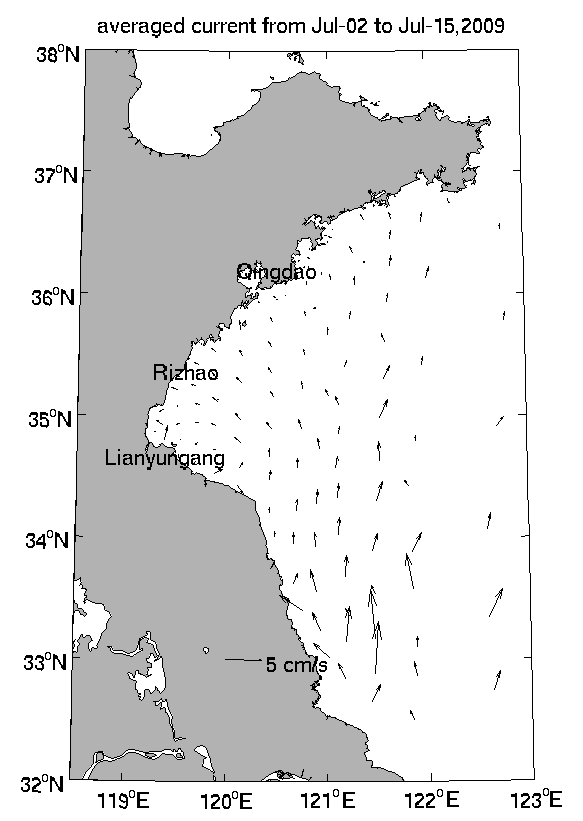 | 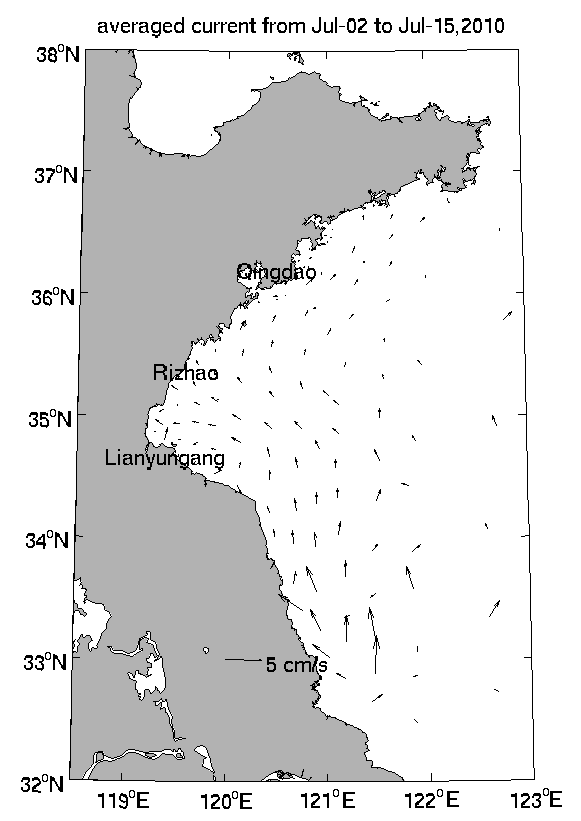 | 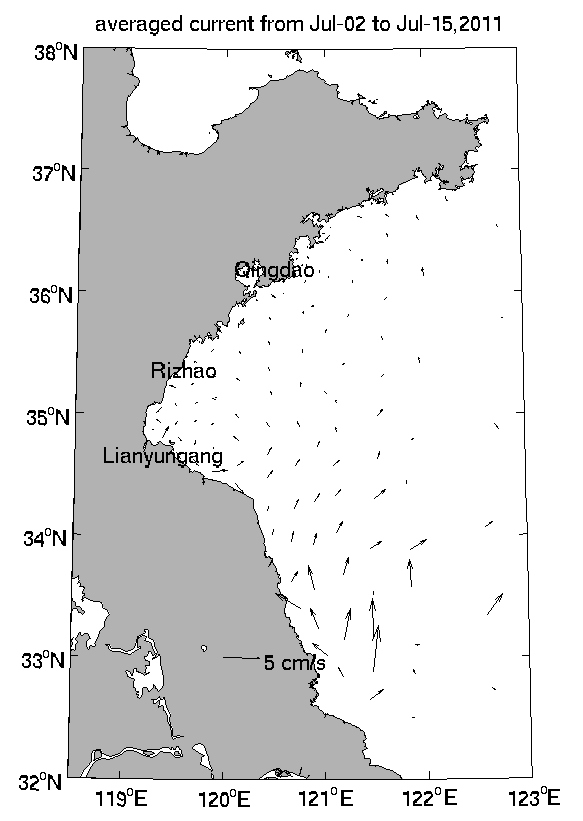 |
| --- | --- | --- | --- |
| 2–15July  **Figure S3.** Mean surface currents in the Yellow Sea during June and July (2008–2011), derived from the Delft-3D model. | | | |

© 2015 by the authors; licensee MDPI, Basel, Switzerland. This article is an open access article distributed under the terms and conditions of the Creative Commons Attribution license (http://creativecommons.org/licenses/by/4.0/).
